1        **Clinical analysis of myocardial injury in highlanders with pulmonary hypertension**

2

3        Maolin Zhao<sup>1#</sup>, Qianjin Wu<sup>2#</sup>, Wangsheng Duanmu<sup>3</sup>, Junxian Shen<sup>3</sup>, Weixin Yuan<sup>3</sup>, Yingbin

4        Sun<sup>4</sup>, Xu Zhang<sup>4</sup>, Jinbao Zhang<sup>1</sup>, Siyi He<sup>1\*</sup>

5

6        1 Department of cardiovascular surgery, Affiliated Hospital of Southwest Jiaotong University,

7        The General Hospital of Western Theater Command, Chengdu, China.

8        2 Department of health service, Tibetan Military General Hospital, Lhasa, China.

9        3 Department of neurology, Tibetan Military General Hospital, Lhasa, China.

10       4 Department of cardiology, Tibetan Military General Hospital, Lhasa, China.

11

12

13       # These authors contributed equally to this article.

14

15       \* Correspondence to Siyi He. Address: General Hospital of Western Theater Command,

16       Rongdu Avenue No.270, Jinniu District, Chengdu City, Sichuan Province, China, 610083.

17       Phone: +86-13558837339. Email: hesiyi@vip.163.com

18

19

1 **Abstract**

2 **Background:** High altitude environment can give rise to Myocardial injury (MI) mainly  
3 because of hypoxia, where MI with pulmonary hypertension (PH) is one of the severe  
4 pathologies. In the present study, we intend to explore clinical characteristics of MI in patients  
5 with PH at high altitude and diagnostic value of various myocardial markers.

6 **Methods:** Consecutive patients at the altitude of 3650m were selected into this retrospective  
7 study. Clinical and biochemical data were collected. According to the results of Cardiac  
8 troponin I (cTnI), patients were divided into MI group and non-MI group.

9 **Results:** A total of 231 patients were enrolled in this study. MI occurred in 29 patients  
10 (12.6%). We found that body mass index (BMI,  $P=0.045$ ), left ventricular end-diastolic  
11 dimension (LVEDD,  $P=0.005$ ), and serum level of creatine kinase-MB (CK-MB,  $P=0.001$ ) in  
12 MI group were significantly higher than that in non-MI group. Spearman correlation analysis  
13 revealed that cTnI have a significant positive correlation with CK-MB ( $P=0.000$ ) and LDH ( $P$   
14  $<0.001$ ) instead of aspartate aminotransferase (AST). A receiver operating characteristic  
15 (ROC) curve was drawn to demonstrate that CK-MB could significantly predict the  
16 occurrence of MI with an area under the curve (AUC) of 0.749 ( $P=0.000$ ), and the level of  
17 3.035 (sensitivity = 59.3%, specificity = 90.5%) was optimal cutoff value.

18 **Conclusion:** The incidence of MI with PH is high in highlander. As a convenient and efficient  
19 marker, CK-MB is closely associated with cTnI and have a predict role in the occurrence of  
20 MI with PH under expose to high altitude hypoxia.

21

22 **Keywords:** creatine kinase-MB, myocardial injury, high altitude, myocardial enzymes,

1 pulmonary hypertension

2

3

4

## 1 **1. Introduction**

2 The number of people visiting and living in high altitude has increased in recent years. It  
3 is estimated that 81.6 million people live at > 2,500 m and 14.4 million people live at  $\geq$  3,500  
4 m<sup>[1]</sup>. High altitude is characterized by hypobaric and hypoxia. The heart is highly sensitive to  
5 hypoxia and prolonged exposure to altitude-associated chronic hypoxia may cause myocardial  
6 injury (MI), which is characterized by varying degrees of elevation of serum myocardial  
7 enzymes. High altitude environment tends to cause increased pulmonary circulation  
8 resistance, thus forming pulmonary hypertension (PH), which is one of the most common  
9 abnormal cardiovascular complications<sup>[3]</sup>. Hypoxia-induced PH is a major health problem at  
10 high-altitude regions of the world. Previous study on Kyrgyz highlanders have reported 14–  
11 20% of the population with PH<sup>[4]</sup>. Furian et al. <sup>[5]</sup> suggested that highlanders with PH at high  
12 altitude may be at increased risk of cardiovascular mortality and morbidity. Therefore, more  
13 attention should be paid on the MI with PH at high altitude.

14 MI is a severe complication in population exposed to high altitude and may leads to  
15 malignant arrhythmias, heart failure, and even sudden death<sup>[6]</sup>. Our previous study found that  
16 the incidence of MI was as high as 33.2% in population transferring from high altitude<sup>[7]</sup>.  
17 Hypoxic and hypobaric environment will cause the damage of the cardiac cells, leading to the  
18 elevation of serum myocardial enzymes to varying degrees<sup>[8]</sup>. Cardiac troponin I (cTnI) and T  
19 (cTnT) are expressed almost exclusively in the heart, which are preferred biomarkers of MI  
20 with high specificity and sensitivity<sup>[9]</sup>. Thus, they have been regarded as the gold-standard  
21 marker for MI<sup>[10]</sup>. However, it is difficult to detect cTnI for the reason that the work of  
22 instruments is limited at high altitude. Thus, it is important to investigating the other classical

1 MI markers to replace troponin for the prevention and diagnosis of MI at high altitude, such  
2 as creatine kinase (CK), lactic dehydrogenase (LDH), and aspartate aminotransferase  
3 (AST)<sup>[11]</sup>. Several studies have used these myocardial enzymes as indicators for the evaluation  
4 of MI at high altitude. He et al. <sup>[12]</sup> found that CK, CK-MB, and LDH levels altered in high-  
5 altitude de-acclimatization syndrome after exposure to high altitudes. Zhou et al. <sup>[13]</sup>  
6 suggested that the cardiac function index was negatively correlated with the levels of creatine  
7 kinase-MB (CK-MB) and LDH.

8 In this study, population exposed to high altitude with PH were included, and  
9 comparisons between MI and non-MI were analyzed. We intended to explore the diagnostic  
10 value of various myocardial markers for MI in patients with PH at high altitude, thereby  
11 providing theoretical basis for early clinical prevention and treatment.

12

## 13 **2. Materials and Methods**

### 14 **2.1 Study settings**

15 Consecutive patients admitted to the department of cardiovascular medicine in a general  
16 tertiary hospital at the altitude of 3650m were included. Inclusion criteria: (1) Based on  
17 ESC/ERS Guidelines for the diagnosis and treatment of pulmonary hypertension<sup>[14]</sup>, all  
18 included patients were diagnosed with PH by using echocardiography with the criteria of  
19 tricuspid valve regurgitation (TVR) peak velocity > 280 cm/s; (2) adult patients aged >18  
20 years old; (3) living continuously at high altitude (>3000m) more than one year. Exclusion  
21 criteria: (1) all kinds of cardiomyopathy, including ischemic, dilated, hypertrophic, and so on;  
22 (2) pulmonary embolism; (3) myocarditis; (4) congenital heart disease. According to the

1 fourth universal definition of myocardial infarction<sup>[15]</sup>, patients were diagnosed with MI once  
2 the serum level of cTnI was greater than 0.1ng/ml, who were classified into MI group while  
3 the others were classified into non-MI group.

## 4 **2.2 Data collection**

5 Basic information of patients was collected through electronic medical record, including  
6 age, gender, body mass index (BMI), living altitude, aborigines, and smoke.  
7 Echocardiography and electrocardiogram were performed after admission, and then we could  
8 get the indexes including TVR velocity, left ventricular end-diastolic dimension (LVEDD)  
9 and heart rate (HR). Early morning fasting blood was drawn from all patients after admission  
10 for examination to acquire the data about red blood cell count (RBC), hemoglobin (Hb),  
11 platelet count, red blood cell distribution width (RDW), platelet distribution width (PDW),  
12 alanine transaminase (ALT), AST, total bilirubin, direct bilirubin, albumin, globulin, urea  
13 nitrogen, creatinine, uric acid, total cholesterol, triglyceride, high density lipoprotein  
14 cholesterin (HDL-C), low density lipoprotein cholesterin (LDL-C), apolipoprotein A1  
15 (ApoA1), apolipoprotein B (ApoB), LDH, CK-MB, prothrombin time (PT), activated partial  
16 thromboplastin time (APTT) and D-dimer (D-D).

## 17 **2.3 Statistical analysis**

18 The software SPSS version 25.0 was used to perform statistical analysis, and difference  
19 was considered to be significant once P value was lower than 0.05. Normal distribution was  
20 examined according to Kolmogorov-Smirnov test. Normally distributed measurement data  
21 were expressed as mean value  $\pm$  standard deviation, and comparisons between groups were  
22 analyzed by using t test. Abnormally distributed measurement data were expressed as median

1 value (Q1-Q3), and comparisons between groups were analyzed by using Mann-Whitney U  
2 test. Comparisons of enumeration data between groups were analyzed by using chi-square  
3 test. Spearman analysis was used to evaluate the correlation between two indexes. Diagnostic  
4 accuracy was evaluated by receiver operating characteristic (ROC) curve as assessed by area  
5 under the ROC curve (AUC). The optimal cut-off values were determined by using the  
6 Youden index.

## 7 **2.4 Patient and public involvement**

8 This study was retrospective, and all patients were not initiative to be enrolled in the  
9 present research. Medical data were collected through electronic medical record system. No  
10 personal information about the patients were included in this study.

11

## 12 **3. Results**

### 13 **3.1 Clinical features of MI with PH patients at high altitude**

14 A total of 231 patients at high altitude with PH were included in the present study, of  
15 which 29 patients were diagnosed with MI, accounting for 12.6%. As Table 1 showed,  
16 patients in MI group had higher BMI than those in non-MI group [(26.1±4.0) kg/m<sup>2</sup> vs.  
17 (24.4±4.2) kg/m<sup>2</sup>, P=0.045]. LVEDD was significantly increased in MI group compared with  
18 non-MI group [44(41.5-52.5) mm vs. 42(40-45) mm, P=0.005]. Once MI occurred, the serum  
19 level of CK-MB could also significantly upregulate [3.47(2.1-7.6) U/L vs. 1.37(1.1-2.4) U/L,  
20 P=0.001].

### 21 **3.2 Correlation between cTnI and other myocardial enzymes**

22 As Table 2 showed, the level of cTnI was positively correlated with the level of CK-MB

1 (r=0.571, P=0.000) and LDH (r=0.212, P=0.001). There was no significant correlation  
2 between the level of AST and cTnI.

### 3 **3.3 Diagnostic value of myocardial markers**

4 ROC curves were drawn to evaluate the usefulness of classic myocardial markers  
5 including CK-MB, AST and LDH in diagnosing MI, as presented in Figure 1. As shown in  
6 Table 3, only CK-MB had a significant diagnostic value in MI with AUC of 0.749 at the  
7 optimal cut-off value of 3.035 (P=0.000). The sensitivity was 0.593, and the specificity was  
8 0.905. AST and LDH had no diagnostic significance for MI in PH patients at high altitude.

9

## 10 **4. Discussion**

11 Millions of tourists and climbers visit high altitudes annually. Many healthy individuals  
12 may suffer from altitude illnesses when visiting to these high regions, including acute  
13 mountain sickness (AMS), high altitude cerebral edema and high altitude pulmonary edema  
14 (HAPE) and, notably, PH, which can eventually lead to right ventricle hypertrophy and heart  
15 failure<sup>[16]</sup>. Furthermore, increased pulmonary artery pressures, acute hypoxia, increased  
16 myocardial work, and increased epinephrine release may cause or exacerbate MI at high  
17 altitude<sup>[17]</sup>. At present, there are few studies focusing on MI with PH at high altitude. In the  
18 present research, the prevalence of MI was 12.6%, which lower than our previous study<sup>[7, 18]</sup>.  
19 One possible reason for the lower prevalence was that different diagnostic standards were  
20 used. To be specific, due to the limitation of high altitude environment, the previous studies  
21 used CK, CK-MB, LDH, and AST to diagnose MI, while cTnI was used in present study. In  
22 addition, altitude acclimatization may be another important contributor. This study mainly



1 included population with long-term exposure to the high altitude and aborigines, so adaptive  
2 changes may occur in the cardiovascular system, making the heart more tolerant to hypoxia.  
3 Adaptation to high-altitude hypoxia increases the cardiac tolerance of highlanders to all the  
4 major deleterious consequences of acute hypoxia. Hypoxia inducible factor (HIF) pathway,  
5 mitochondrial synthesis pathway, blood oxygen transport pathway, tissue oxygen transport  
6 pathway, energy metabolism pathway and other pathways play an important role in the  
7 process of myocardial adaptation to high altitude<sup>[19]</sup>. Evidence suggested that modifications of  
8 the HIF pathway is a crucial mechanism in altitude acclimatization. EGLN1 and EPAS1 is  
9 encode major components of the HIF transcriptional pathway, which coordinates an  
10 organism's response to hypoxia<sup>[20-22]</sup>. In a hypoxic environment at high altitude, the hearts  
11 initiate transcriptional programs to increase dependence on carbohydrates over fatty acid for  
12 ATP production, with altered mitochondrial structure and function that improve metabolic  
13 efficiency and reduce ROS generation, as well as beneficial changes in glycogen storage and  
14 high energy phosphate system to regulate the balance between energy demand and energy  
15 supply when oxygen is limited<sup>[23]</sup>. In addition, Schweizer et al. <sup>[24]</sup> found that heart rate is  
16 increased to improve the delivery of circulating oxygen at high altitude, and attenuation of  
17 catecholamine release improves tissue blood flow during hypoxia. The changes of Hb  
18 function, oxygen transport and aerobic capacity under high altitude play a vital role in the  
19 process of hypoxic adaptation<sup>[25]</sup>, including the evolution of higher rates of alveolar  
20 ventilation and respiratory oxygen uptake<sup>[26]</sup>, higher Hb O<sub>2</sub> affinity<sup>[27]</sup>, as well as altered  
21 skeletal muscle phenotypes enhance the ability of tissue O<sub>2</sub> diffusion and O<sub>2</sub> utilization<sup>[28, 29]</sup>.

22 It is well known that obesity has adverse effects on cardiovascular hemodynamics and

1 cardiac structure and function, thus increasing the incidence of adverse cardiovascular  
2 events<sup>[30]</sup>. Evidence suggests that obesity is a risk factors for AMS and is associated with its  
3 development<sup>[31]</sup>. In present study, MI group had a higher BMI than the non-MI group. Thus,  
4 Elevated BMI may be a risk factor for MI expose to high altitude. Previous study  
5 demonstrated that among individuals without cardiovascular disease, higher BMI was  
6 independently linearly associated with subclinical MI<sup>[32]</sup>. Obesity leads to myocardial  
7 dysfunction by endocrine and inflammatory effects of adipose tissue<sup>[33]</sup>. However, what's  
8 interesting is that obesity appeared to be associated with a lower risk of death once  
9 cardiovascular disease was present<sup>[34]</sup>. This phenomenon has been called the “obesity para-  
10 dox”<sup>[35]</sup>.

11 In this retrospective research, we also found that LVEDD altered significantly in MI with  
12 PH under high-altitude exposure. Left ventricular dilatation is usually the result of multiple  
13 pathological changes that occur during myocardial remodeling in progressive heart failure.  
14 There is an outward remodeling of the left ventricular myocardium during MI, which results  
15 in left ventricular dilatation<sup>[36]</sup>. In our study, the presence of increased LVEDD in MI group  
16 may indicate the heart was going into decompensation phase. Dilated LVEDD was related to  
17 left ventricular dysfunction and may be a signal of advanced heart disease<sup>[37]</sup>. Left ventricular  
18 dilatation is an independent predictor of MI<sup>[38]</sup>. Chen et al. <sup>[39]</sup> suggested that LVEDD may be  
19 used to identify heart fail patients who require more aggressive therapeutic interventions. Left  
20 ventricular (LV) enlargement is an independent predictor of cardiovascular events in patients ,  
21 and the addition of LV volumes to LV diameters increased the predictive value for  
22 cardiovascular outcomes <sup>[40]</sup>. Therefore, screening for LVEDD dilatation in the general

1 population at high altitude may identify a high-risk population for preventive treatment.

2       Although Troponin has been regarded as the gold-standard biomarker for MI<sup>[41]</sup>, other  
3 myocardial enzymes may be helpful in cases where troponin cannot be detected. CK-MB is  
4 relatively specific for myocardial tissue, and CK-MB levels are most valuable for the  
5 diagnosis of myocardial infarction when skeletal muscle injury or disease is excluded, but the  
6 expression of AST and LDH in a wide variety of tissues significantly affects its specificity for  
7 MI<sup>[42]</sup>. In our study, it has been suggested that CK-MB and LDH were closely associated with  
8 the expression of cTnI. Furthermore, ROC curve was drawn to demonstrate that CK-MB level  
9 could predict the occurrence of MI with an AUC of 0.749 to a limited extent. Similarly,  
10 Previous studies have suggested that CK-MB provides a reliable and specific diagnosis with  
11 high accuracy in the first few hours of onset of cardiac symptoms<sup>[43]</sup>. However, AST and LDH  
12 were dropped due to lack of specificity in the diagnosis of acute myocardial infarction<sup>[44]</sup>.  
13 Thus, we suggest that CK-MB may be a good diagnostic marker when it is hard to measure of  
14 cTnI in highlanders.

15

## 16 **5. Conclusion**

17       In summary, incidence of MI with PH is high in population at high altitude. BMI,  
18 LVEDD and CK-MB altered significantly in MI with PH under high altitude exposure. As a  
19 convenient marker, CK-MB is found to be closely associated with cTnI and have an effective  
20 diagnostic value in the high-altitude MI with PH. The biggest limitation in our present study  
21 is that only patients with PH are included, so whether the findings can be extended to all  
22 population at high altitude still needs further study.

1

## 2 **CRedit authorship contribution statement**

3 MZ: Data curation, Formal analysis, Writing-Original Draft; QW: Data curation,  
4 Validation, Visualization; WD: Data curation, Writing-Original Draft; JS: Data curation,  
5 Validation; WY: Data curation, Validation; YS: Data curation, Validation; XZ: Formal  
6 analysis, Writing-Reviewing and Editing; JZ: Supervision, Writing-Reviewing and Editing;  
7 SH: Conceptualization, Supervision, Funding acquisition, Writing-Reviewing and Editing.

8

## 9 **Fundings**

10 This study is granted by Natural Science Foundation of Sichuan Province (No.  
11 2022NSFSC1295), the 2021 annual project of the General Hospital of Western Theater  
12 Command (No. 2021-XZYG-B31).

13

## 14 **Conflict of interest**

15 The authors declare that the research was conducted in the absence of any commercial or  
16 financial relationships that could be construed as a potential conflict of interest.

17

## 18 **Publisher's note**

19 All claims expressed in this article are solely those of the authors and do not necessarily  
20 represent those of their affiliated organizations, or those of the publisher, the editors and the  
21 reviewers. Any product that may be evaluated in this article, or claim that may be made by its  
22 manufacturer, is not guaranteed or endorsed by the publisher.

1

## 2 **References**

3 [1] TREMBLAY J C, AINSLIE P N. Global and country-level estimates of human  
4 population at high altitude [J]. Proceedings of the National Academy of Sciences of  
5 the United States of America, 2021, 118(18).

6 [2] LUO G, JIAN Z, ZHU Y, et al. Sirt1 promotes autophagy and inhibits apoptosis to  
7 protect cardiomyocytes from hypoxic stress [J]. International journal of molecular  
8 medicine, 2019, 43(5): 2033-43.

9 [3] HOU J, WEN X, LONG P, et al. The role of post-translational modifications in  
10 driving abnormal cardiovascular complications at high altitude [J]. Frontiers in  
11 cardiovascular medicine, 2022, 9: 886300.

12 [4] ALDASHEV A A, SARYBAEV A S, SYDYKOV A S, et al. Characterization of high-  
13 altitude pulmonary hypertension in the Kyrgyz: association with angiotensin-  
14 converting enzyme genotype [J]. American journal of respiratory and critical care  
15 medicine, 2002, 166(10): 1396-402.

16 [5] FURIAN M, LATSHANG T D, AESCHBACHER S S, et al. Markers of  
17 cardiovascular risk and their reversibility with acute oxygen therapy in Kyrgyz  
18 highlanders with high altitude pulmonary hypertension [J]. Pulmonology, 2021,  
19 27(5): 394-402.

20 [6] LÜSCHER T F. Refining cardiovascular risk: anthropometric measures, potassium,  
21 high altitude exposure, and cancer therapy [J]. European heart journal, 2018, 39(17):  
22 1499-502.

- 1 [7] HE S, HE S, YANG Y, et al. Correlation Between Neutrophil to Lymphocyte Ratio  
2 and Myocardial Injury in Population Exposed to High Altitude [J]. *Frontiers in*  
3 *cardiovascular medicine*, 2021, 8: 738817.
- 4 [8] NEVES A L, HENRIQUES-COELHO T, LEITE-MOREIRA A, et al. Cardiac injury  
5 biomarkers in paediatric age: Are we there yet? [J]. *Heart failure reviews*, 2016,  
6 21(6): 771-81.
- 7 [9] MAIR J, LINDAHL B, HAMMARSTEN O, et al. How is cardiac troponin released  
8 from injured myocardium? [J]. *European heart journal Acute cardiovascular care*,  
9 2018, 7(6): 553-60.
- 10 [10] PARK K C, GAZE D C, COLLINSON P O, et al. Cardiac troponins: from myocardial  
11 infarction to chronic disease [J]. *Cardiovascular research*, 2017, 113(14): 1708-18.
- 12 [11] PARSANATHAN R, JAIN S K. Novel Invasive and Noninvasive Cardiac-Specific  
13 Biomarkers in Obesity and Cardiovascular Diseases [J]. *Metabolic syndrome and*  
14 *related disorders*, 2020, 18(1): 10-30.
- 15 [12] HE B, WANG J, QIAN G, et al. Analysis of high-altitude de-acclimatization  
16 syndrome after exposure to high altitudes: a cluster-randomized controlled trial [J].  
17 *PloS one*, 2013, 8(5): e62072.
- 18 [13] ZHOU Q, YANG S, LUO Y, et al. A randomly-controlled study on the cardiac  
19 function at the early stage of return to the plains after short-term exposure to high  
20 altitude [J]. *PloS one*, 2012, 7(2): e31097.
- 21 [14] HUMBERT M, KOVACS G, HOEPER M M, et al. 2022 ESC/ERS Guidelines for the  
22 diagnosis and treatment of pulmonary hypertension [J]. *European heart journal*, 2022,

- 1 43(38): 3618-731.
- 2 [15] THYGESEN K, ALPERT J S, JAFFE A S, et al. Fourth Universal Definition of  
3 Myocardial Infarction (2018) [J]. *Circulation*, 2018, 138(20): e618-e51.
- 4 [16] PENA E, EL ALAM S, SIQUES P, et al. Oxidative Stress and Diseases Associated  
5 with High-Altitude Exposure [J]. *Antioxidants (Basel, Switzerland)*, 2022, 11(2).
- 6 [17] HIGGINS J P, TUTTLE T, HIGGINS J A. Altitude and the heart: is going high safe  
7 for your cardiac patient? [J]. *American heart journal*, 2010, 159(1): 25-32.
- 8 [18] HE S, ZHANG Q, WU F, et al. Influence of cigarettes on myocardial injury in healthy  
9 population after exposure to high altitude over 5000 m [J]. *The Science of the total*  
10 *environment*, 2023, 855: 158824.
- 11 [19] OSTADAL B, KOLAR F. Cardiac adaptation to chronic high-altitude hypoxia:  
12 beneficial and adverse effects [J]. *Respiratory physiology & neurobiology*, 2007,  
13 158(2-3): 224-36.
- 14 [20] PETOUSI N, CROFT Q P, CAVALLERI G L, et al. Tibetans living at sea level have a  
15 hyporesponsive hypoxia-inducible factor system and blunted physiological responses  
16 to hypoxia [J]. *Journal of applied physiology (Bethesda, Md : 1985)*, 2014, 116(7):  
17 893-904.
- 18 [21] XIANG K, OUZHULUOBU, PENG Y, et al. Identification of a Tibetan-specific  
19 mutation in the hypoxic gene EGLN1 and its contribution to high-altitude adaptation  
20 [J]. *Molecular biology and evolution*, 2013, 30(8): 1889-98.
- 21 [22] XIN J, ZHANG H, HE Y, et al. Chromatin accessibility landscape and regulatory  
22 network of high-altitude hypoxia adaptation [J]. *Nature communications*, 2020, 11(1):

- 1           4928.
- 2   [23]   SU Z, LIU Y, ZHANG H. Adaptive Cardiac Metabolism Under Chronic Hypoxia:  
3           Mechanism and Clinical Implications [J]. *Frontiers in cell and developmental*  
4           *biology*, 2021, 9: 625524.
- 5   [24]   SCHWEIZER R M, VELOTTA J P, IVY C M, et al. Physiological and genomic  
6           evidence that selection on the transcription factor *Epas1* has altered cardiovascular  
7           function in high-altitude deer mice [J]. *PLoS genetics*, 2019, 15(11): e1008420.
- 8   [25]   STORZ J F. High-Altitude Adaptation: Mechanistic Insights from Integrated  
9           Genomics and Physiology [J]. *Molecular biology and evolution*, 2021, 38(7): 2677-  
10          91.
- 11 [26]   IVY C M, SCOTT G R. Control of breathing and ventilatory acclimatization to  
12          hypoxia in deer mice native to high altitudes [J]. *Acta physiologica (Oxford,*  
13          *England)*, 2017, 221(4): 266-82.
- 14 [27]   STORZ J F, RUNCK A M, MORIYAMA H, et al. Genetic differences in hemoglobin  
15          function between highland and lowland deer mice [J]. *The Journal of experimental*  
16          *biology*, 2010, 213(Pt 15): 2565-74.
- 17 [28]   SCOTT G R, ELOGIO T S, LUI M A, et al. Adaptive Modifications of Muscle  
18          Phenotype in High-Altitude Deer Mice Are Associated with Evolved Changes in  
19          Gene Regulation [J]. *Molecular biology and evolution*, 2015, 32(8): 1962-76.
- 20 [29]   MAHALINGAM S, MCCLELLAND G B, SCOTT G R. Evolved changes in the  
21          intracellular distribution and physiology of muscle mitochondria in high-altitude  
22          native deer mice [J]. *The Journal of physiology*, 2017, 595(14): 4785-801.



- 1 [30] LAVIE C J, PANDEY A, LAU D H, et al. Obesity and Atrial Fibrillation Prevalence,  
2 Pathogenesis, and Prognosis: Effects of Weight Loss and Exercise [J]. Journal of the  
3 American College of Cardiology, 2017, 70(16): 2022-35.
- 4 [31] CARAVEDO M A, MOZO K, MORALES M L, et al. Risk factors for acute mountain  
5 sickness in travellers to Cusco, Peru: coca leaves, obesity and sex [J]. Journal of  
6 travel medicine, 2022, 29(5).
- 7 [32] NDUMELE C E, CORESH J, LAZO M, et al. Obesity, subclinical myocardial injury,  
8 and incident heart failure [J]. JACC Heart failure, 2014, 2(6): 600-7.
- 9 [33] MARTIN S S, QASIM A, REILLY M P. Leptin resistance: a possible interface of  
10 inflammation and metabolism in obesity-related cardiovascular disease [J]. Journal of  
11 the American College of Cardiology, 2008, 52(15): 1201-10.
- 12 [34] BUETTNER H J, MUELLER C, GICK M, et al. The impact of obesity on mortality  
13 in UA/non-ST-segment elevation myocardial infarction [J]. European heart journal,  
14 2007, 28(14): 1694-701.
- 15 [35] HIDVEGI R, PUELACHER C, GUALANDRO D M, et al. Obesity paradox and  
16 perioperative myocardial infarction/injury in non-cardiac surgery [J]. Clinical  
17 research in cardiology : official journal of the German Cardiac Society, 2020, 109(9):  
18 1140-7.
- 19 [36] KONSTAM M A, KRAMER D G, PATEL A R, et al. Left ventricular remodeling in  
20 heart failure: current concepts in clinical significance and assessment [J]. JACC  
21 Cardiovascular imaging, 2011, 4(1): 98-108.
- 22 [37] ALEONG R G, MULVAHILL M J, HALDER I, et al. Left Ventricular Dilatation

- 1           Increases the Risk of Ventricular Arrhythmias in Patients With Reduced Systolic  
2           Function [J]. *Journal of the American Heart Association*, 2015, 4(8): e001566.
- 3   [38]   YEBOAH J, BLUEMKE D A, HUNDLEY W G, et al. Left ventricular dilation and  
4           incident congestive heart failure in asymptomatic adults without cardiovascular  
5           disease: multi-ethnic study of atherosclerosis (MESA) [J]. *Journal of cardiac failure*,  
6           2014, 20(12): 905-11.
- 7   [39]   CHEN Y C, HSING S C, CHAO Y P, et al. Clinical Relevance of the LVEDD and  
8           LVESD Trajectories in HF Patients With LVEF < 35 [J]. *Frontiers in medicine*, 2022,  
9           9: 846361.
- 10 [40]   ITO K, LI S, HOMMA S, et al. Left ventricular dimensions and cardiovascular  
11          outcomes in systolic heart failure: the WARCEF trial [J]. *ESC heart failure*, 2021,  
12          8(6): 4997-5009.
- 13 [41]   THYGESEN K, ALPERT J S, JAFFE A S, et al. Third universal definition of  
14          myocardial infarction [J]. *Circulation*, 2012, 126(16): 2020-35.
- 15 [42]   TILEA I, VARGA A, SERBAN R C. Past, Present, and Future of Blood Biomarkers  
16          for the Diagnosis of Acute Myocardial Infarction-Promises and Challenges [J].  
17          *Diagnostics (Basel, Switzerland)*, 2021, 11(5).
- 18 [43]   DANESE E, MONTAGNANA M. An historical approach to the diagnostic  
19          biomarkers of acute coronary syndrome [J]. *Annals of translational medicine*, 2016,  
20          4(10): 194.
- 21 [44]   PENTTILÄ I, PENTTILÄ K, RANTANEN T. Laboratory diagnosis of patients with  
22          acute chest pain [J]. *Clinical chemistry and laboratory medicine*, 2000, 38(3): 187-97.

1

2

1 **Figure Legend**

2 **Figure 1.** Receiver operating characteristic (ROC) curve for the values of (A) creatine kinase-  
3 MB (CK-MB), (B) aspartate aminotransferase (AST) and (C) lactic dehydrogenase (LDH) in  
4 diagnosing myocardial injury with pulmonary hypertension.  
5

1 **Table 1.** Comparisons of clinical data between MI group and non-MI group.

2

| Variables                            | MI group<br>(n=29) | non-MI group<br>(n=202) | P Value        |
|--------------------------------------|--------------------|-------------------------|----------------|
| Age (y)                              | 55.1±18.0          | 48.9±19.7               | 0.117          |
| Male                                 | 23                 | 134                     | 0.205          |
| BMI (kg/m <sup>2</sup> )             | 26.1±4.0           | 24.4±4.2                | <b>0.045*</b>  |
| Living altitude (km)                 | 3650(3600-4400)    | 3650(3600-3800)         | 0.422          |
| Aborigines                           | 20                 | 121                     | 0.415          |
| Smoke                                | 13                 | 66                      | 0.454          |
| TVR velocity (cm/s)                  | 339(288-382.5)     | 320(290-390.25)         | 0.713          |
| LVEDD (mm)                           | 44(41.5-52.5)      | 42(40-45)               | <b>0.005**</b> |
| HR (/min)                            | 74(67.5-86)        | 79(68-92.25)            | 0.270          |
| RBC (*10 <sup>12</sup> /L)           | 6.0±1.2            | 5.8±1.2                 | 0.407          |
| Hemoglobin (g/L)                     | 168.3±35.5         | 168.3±35.5              | 0.686          |
| Platelet count (*10 <sup>9</sup> /L) | 192.0±80.0         | 185.9±75.4              | 0.692          |
| RDW                                  | 48(44-57)          | 48(44-57)               | 0.606          |
| PDW                                  | 13(11-14.75)       | 13(11-15)               | 0.920          |
| ALT (U/L)                            | 22(12.5-35)        | 23.5(16-37)             | 0.247          |
| AST (U/L)                            | 20(16.5-31.5)      | 23(17-33)               | 0.465          |
| Total bilirubin (µmol/L)             | 19.5(11.6-28.9)    | 17.5(12.6-28.6)         | 0.720          |
| Direct bilirubin (µmol/L)            | 5.7(3.6-12.8)      | 5.6(3.4-10.1)           | 0.450          |
| Albumin (g/L)                        | 39.9(34.7-45.0)    | 41.5(35.7-45.7)         | 0.534          |
| Globulin (g/L)                       | 31.3(26.6-34.3)    | 29(25.6-33)             | 0.106          |
| Urea nitrogen (mmol/L)               | 5.6(4.3-6.2)       | 5.4(4.1-6.6)            | 0.791          |
| Creatinine (µmol/L)                  | 76.2(63.5-87.7)    | 72(57.4-81.7)           | 0.268          |
| Uric acid (umol/L)                   | 462.0±138.3        | 454.6±144.8             | 0.797          |
| Total cholesterol (mmol/L)           | 4.3±1.1            | 4.0±1.2                 | 0.216          |
| Triglyceride (mmol/L)                | 1.2(0.9-1.8)       | 1.1(0.8-1.6)            | 0.291          |
| HDL-C (mmol/L)                       | 1.1±0.4            | 1.0±0.3                 | 0.507          |
| LDL-C (mmol/L)                       | 2.4±1.0            | 2.2±0.9                 | 0.280          |
| ApoA1 (g/L)                          | 1.16(0.93-1.26)    | 1.13(1.02-1.23)         | 0.940          |
| ApoB (g/L)                           | 0.8±0.2            | 0.7±0.2                 | 0.180          |
| LDH (U/L)                            | 239.5(162.3-293.8) | 198(156.6-276)          | 0.264          |

|                      |                 |                 |                |
|----------------------|-----------------|-----------------|----------------|
| <b>CK-MB (ng/mL)</b> | 3.47(2.1-7.6)   | 1.37(1.1-2.4)   | <b>0.001**</b> |
| <b>PT (s)</b>        | 11.1(10.4-14.3) | 11.4(10.6-12.6) | 0.937          |
| <b>APTT (s)</b>      | 34.3(29.9-47.1) | 33.8(30.3-39.2) | 0.328          |
| <b>D-D</b>           | 0.2(0.2-2.3)    | 0.3(0.2-0.9)    | 0.926          |

1 MI=myocardial injury; BMI=body mass index; TVR=tricuspid valve regurgitation; LVEDD=  
2 left ventricular end-diastolic dimension; HR=heart rate; RBC=red blood cell count; RDW=red  
3 blood cell distribution width; PDW=platelet distribution width; ALT=alanine transaminase;  
4 AST=aspartate aminotransferase; HDL-C= high density lipoprotein cholesterol; LDL-C= low  
5 density lipoprotein cholesterol; ApoA1=apolipoprotein A1; ApoB=apolipoprotein B;  
6 LDH=lactate dehydrogenase; CK-MB=creatine kinase-MB; PT=prothrombin time;  
7 APTT=activated partial thromboplastin time; D-D=D-dimer.

8 \* Indicates significance at level 0.05

9 \*\* Indicates significance at level 0.01

10 Bold value indicates difference is significant.

11

1 **Table 2.** Correlation between cTnI and other myocardial enzymes.

2

|                        | <b>CK-MB</b> | <b>AST</b> | <b>LDH</b>   |
|------------------------|--------------|------------|--------------|
| <b>coefficient (r)</b> | 0.571        | 0.009      | 0.212        |
| <b>P value</b>         | <b>0.000</b> | 0.891      | <b>0.001</b> |

3

4 CK-MB=creatine kinase-MB; AST=aspartate aminotransferase; LDH=lactate dehydrogenase.

5 Bold value indicates difference is significant.

6

7

1 **Table 3.** Diagnostic value of CK-MB, AST and LDH for MI.

2

|                      | <b>CK-MB</b> | <b>AST</b> | <b>LDH</b> |
|----------------------|--------------|------------|------------|
| <b>AUC</b>           | 0.749        | 0.542      | 0.565      |
| <b>Youden index</b>  | 0.498        | 0.141      | 0.206      |
| <b>Cut-off value</b> | 3.035        | 22.500     | 233.500    |
| <b>Sensitivity</b>   | 0.593        | 0.379      | 0.571      |
| <b>Specificity</b>   | 0.905        | 0.480      | 0.635      |
| <b>P value</b>       | <b>0.000</b> | 0.466      | 0.264      |

3

4 CK-MB=creatine kinase-MB; AST=aspartate aminotransferase; LDH=lactate dehydrogenase;

5 MI=myocardial injury; AUC=area under curve.

6 Bold value indicates difference is significant.

7

8



**Table 2.** Correlation between cTnI and other myocardial enzymes.

|                        | <b>CK-MB</b> | <b>AST</b> | <b>LDH</b>   |
|------------------------|--------------|------------|--------------|
| <b>coefficient (r)</b> | 0.571        | 0.009      | 0.212        |
| <b>P value</b>         | <b>0.000</b> | 0.891      | <b>0.001</b> |

CK-MB=creatine kinase-MB; AST=aspartate aminotransferase; LDH=lactate dehydrogenase.

Bold value indicates difference is significant.

**Table 3.** Diagnostic value of CK-MB, AST and LDH for MI.

|                      | <b>CK-MB</b> | <b>AST</b> | <b>LDH</b> |
|----------------------|--------------|------------|------------|
| <b>AUC</b>           | 0.749        | 0.542      | 0.565      |
| <b>Youden index</b>  | 0.498        | 0.141      | 0.206      |
| <b>Cut-off value</b> | 3.035        | 22.500     | 233.500    |
| <b>Sensitivity</b>   | 0.593        | 0.379      | 0.571      |
| <b>Specificity</b>   | 0.905        | 0.480      | 0.635      |
| <b>P value</b>       | <b>0.000</b> | 0.466      | 0.264      |

CK-MB=creatine kinase-MB; AST=aspartate aminotransferase; LDH=lactate dehydrogenase;

MI=myocardial injury; AUC=area under curve.

Bold value indicates difference is significant.

**Table 1.** Comparisons of clinical data between MI group and non-MI group.

| Variables                            | MI group<br>(n=29) | non-MI group<br>(n=202) | P Value        |
|--------------------------------------|--------------------|-------------------------|----------------|
| Age (y)                              | 55.1±18.0          | 48.9±19.7               | 0.117          |
| Male                                 | 23                 | 134                     | 0.205          |
| BMI (kg/m <sup>2</sup> )             | 26.1±4.0           | 24.4±4.2                | <b>0.045*</b>  |
| Living altitude (km)                 | 3650(3600-4400)    | 3650(3600-3800)         | 0.422          |
| Aborigines                           | 20                 | 121                     | 0.415          |
| Smoke                                | 13                 | 66                      | 0.454          |
| TVR velocity (cm/s)                  | 339(288-382.5)     | 320(290-390.25)         | 0.713          |
| LVEDD (mm)                           | 44(41.5-52.5)      | 42(40-45)               | <b>0.005**</b> |
| HR (/min)                            | 74(67.5-86)        | 79(68-92.25)            | 0.270          |
| RBC (*10 <sup>2</sup> /L)            | 6.0±1.2            | 5.8±1.2                 | 0.407          |
| Hemoglobin (g/L)                     | 168.3±35.5         | 168.3±35.5              | 0.686          |
| Platelet count (*10 <sup>9</sup> /L) | 192.0±80.0         | 185.9±75.4              | 0.692          |
| RDW                                  | 48(44-57)          | 48(44-57)               | 0.606          |
| PDW                                  | 13(11-14.75)       | 13(11-15)               | 0.920          |
| ALT (U/L)                            | 22(12.5-35)        | 23.5(16-37)             | 0.247          |
| AST (U/L)                            | 20(16.5-31.5)      | 23(17-33)               | 0.465          |
| Total bilirubin (μmol/L)             | 19.5(11.6-28.9)    | 17.5(12.6-28.6)         | 0.720          |
| Direct bilirubin (μmol/L)            | 5.7(3.6-12.8)      | 5.6(3.4-10.1)           | 0.450          |
| Albumin (g/L)                        | 39.9(34.7-45.0)    | 41.5(35.7-45.7)         | 0.534          |
| Globulin (g/L)                       | 31.3(26.6-34.3)    | 29(25.6-33)             | 0.106          |
| Urea nitrogen (mmol/L)               | 5.6(4.3-6.2)       | 5.4(4.1-6.6)            | 0.791          |
| Creatinine (μmol/L)                  | 76.2(63.5-87.7)    | 72(57.4-81.7)           | 0.268          |
| Uric acid (umol/L)                   | 462.0±138.3        | 454.6±144.8             | 0.797          |
| Total cholesterol (mmol/L)           | 4.3±1.1            | 4.0±1.2                 | 0.216          |
| Triglyceride (mmol/L)                | 1.2(0.9-1.8)       | 1.1(0.8-1.6)            | 0.291          |

|                       |                    |                 |                |
|-----------------------|--------------------|-----------------|----------------|
| <b>HDL-C (mmol/L)</b> | 1.1±0.4            | 1.0±0.3         | 0.507          |
| <b>LDL-C (mmol/L)</b> | 2.4±1.0            | 2.2±0.9         | 0.280          |
| <b>ApoA1 (g/L)</b>    | 1.16(0.93-1.26)    | 1.13(1.02-1.23) | 0.940          |
| <b>ApoB (g/L)</b>     | 0.8±0.2            | 0.7±0.2         | 0.180          |
| <b>LDH (U/L)</b>      | 239.5(162.3-293.8) | 198(156.6-276)  | 0.264          |
| <b>CK-MB (ng/mL)</b>  | 3.47(2.1-7.6)      | 1.37(1.1-2.4)   | <b>0.001**</b> |
| <b>PT (s)</b>         | 11.1(10.4-14.3)    | 11.4(10.6-12.6) | 0.937          |
| <b>APTT (s)</b>       | 34.3(29.9-47.1)    | 33.8(30.3-39.2) | 0.328          |
| <b>D-D</b>            | 0.2(0.2-2.3)       | 0.3(0.2-0.9)    | 0.926          |

MI=myocardial injury; BMI=body mass index; TVR=tricuspid valve regurgitation; LVEDD= left ventricular end-diastolic dimension; HR=heart rate; RBC=red blood cell count; RDW=red blood cell distribution width; PDW=platelet distribution width; ALT=alanine transaminase; AST=aspartate aminotransferase; HDL-C= high density lipoprotein cholesterol; LDL-C= low density lipoprotein cholesterol; ApoA1=apolipoprotein A1; ApoB=apolipoprotein B; LDH=lactate dehydrogenase; CK-MB=creatine kinase-MB; PT=prothrombin time; APTT=activated partial thromboplastin time; D-D=D-dimer.

\* Indicates significance at level 0.05

\*\* Indicates significance at level 0.01

Bold value indicates difference is significant.

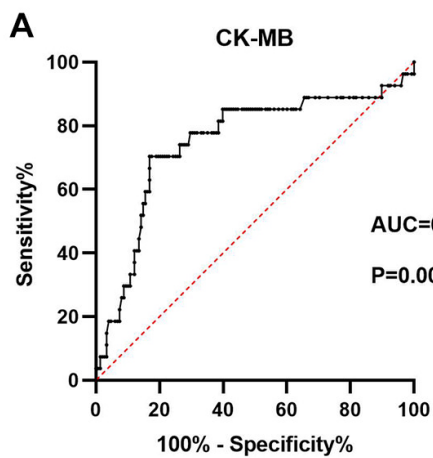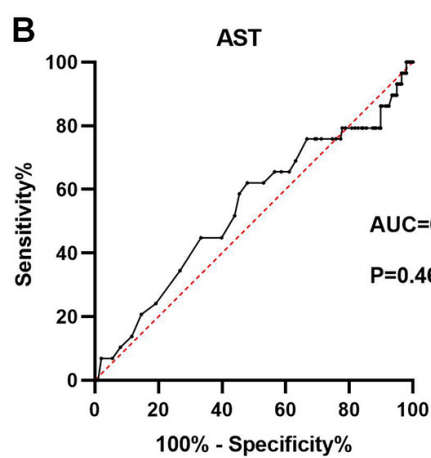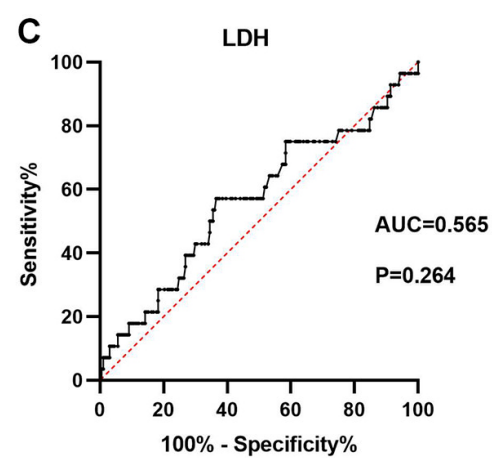

Source: https://medrxiv.org/content/10.1101/2023.05.15.23290019v1.full.pdf
